# Supplementary material
Source: PubMed Central journal article supplement (PMC5754017)

## Supplementary Information

**Table S1: Peptide map of RTA (Y80A V76M) used in HX-MS studies**

| Pep # | start | end |
|-------|-------|-----|-------|-------|-----|-------|-------|-----|-------|-------|-----|
| 1     | 1     | 12  | 36    | 93    | 104 | 71    | 163   | 169 | 106   | 218   | 233 |
| 2     | 13    | 21  | 37    | 93    | 108 | 72    | 166   | 169 | 107   | 218   | 241 |
| 3     | 13    | 25  | 38    | 94    | 100 | 73    | 166   | 172 | 108   | 219   | 226 |
| 4     | 22    | 25  | 39    | 94    | 108 | 74    | 169   | 172 | 109   | 219   | 233 |
| 5     | 26    | 33  | 40    | 103   | 108 | 75    | 170   | 174 | 110   | 221   | 233 |
| 6     | 26    | 38  | 41    | 104   | 108 | 76    | 173   | 182 | 111   | 222   | 233 |
| 7     | 29    | 38  | 42    | 105   | 108 | 77    | 176   | 182 | 112   | 227   | 233 |
| 8     | 34    | 60  | 43    | 105   | 110 | 78    | 179   | 182 | 113   | 227   | 241 |
| 9     | 38    | 60  | 44    | 109   | 118 | 79    | 183   | 187 | 114   | 228   | 241 |
| 10    | 39    | 46  | 45    | 109   | 119 | 80    | 183   | 188 | 115   | 233   | 241 |
| 11    | 39    | 56  | 46    | 109   | 123 | 81    | 183   | 189 | 116   | 233   | 244 |
| 12    | 39    | 58  | 47    | 119   | 123 | 82    | 183   | 191 | 117   | 233   | 249 |
| 13    | 39    | 60  | 48    | 120   | 127 | 83    | 183   | 205 | 118   | 234   | 244 |
| 14    | 57    | 60  | 49    | 124   | 127 | 84    | 188   | 205 | 119   | 234   | 245 |
| 15    | 59    | 62  | 50    | 124   | 130 | 85    | 189   | 205 | 120   | 234   | 247 |
| 16    | 59    | 69  | 51    | 124   | 134 | 86    | 190   | 205 | 121   | 234   | 249 |
| 17    | 61    | 69  | 52    | 124   | 136 | 87    | 190   | 207 | 122   | 241   | 244 |
| 18    | 61    | 70  | 53    | 128   | 134 | 88    | 192   | 205 | 123   | 242   | 245 |
| 19    | 63    | 69  | 54    | 128   | 136 | 89    | 192   | 208 | 124   | 242   | 247 |
| 20    | 70    | 73  | 55    | 131   | 136 | 90    | 196   | 205 | 125   | 242   | 249 |
| 21    | 70    | 74  | 56    | 131   | 152 | 91    | 206   | 211 | 126   | 244   | 249 |
| 22    | 70    | 75  | 57    | 134   | 145 | 92    | 206   | 215 | 127   | 245   | 249 |
| 23    | 71    | 75  | 58    | 135   | 147 | 93    | 206   | 217 | 128   | 246   | 249 |
| 24    | 73    | 80  | 59    | 135   | 152 | 94    | 206   | 218 | 129   | 248   | 254 |
| 25    | 73    | 92  | 60    | 137   | 147 | 95    | 208   | 215 | 130   | 248   | 255 |
| 26    | 74    | 80  | 61    | 137   | 148 | 96    | 208   | 217 | 131   | 248   | 256 |
| 27    | 74    | 92  | 62    | 137   | 152 | 97    | 208   | 218 | 132   | 250   | 254 |
| 28    | 76    | 80  | 63    | 147   | 152 | 98    | 209   | 215 | 133   | 250   | 255 |
| 29    | 76    | 92  | 64    | 148   | 151 | 99    | 209   | 217 | 134   | 250   | 256 |
| 30    | 81    | 92  | 65    | 148   | 152 | 100   | 209   | 218 | 135   | 256   | 268 |
| 31    | 81    | 93  | 66    | 149   | 152 | 101   | 212   | 217 | 136   | 257   | 268 |
| 32    | 85    | 92  | 67    | 153   | 162 | 102   | 212   | 218 | 137   | 258   | 268 |
| 33    | 93    | 100 | 68    | 153   | 165 | 103   | 213   | 217 | 138   | 259   | 268 |
| 34    | 93    | 102 | 69    | 154   | 165 | 104   | 218   | 221 |       |       |     |
| 35    | 93    | 103 | 70    | 163   | 168 | 105   | 218   | 226 |       |       |     |

**Table S2. Data collection associated with X-ray crystal structures of V1C7 V<sub>H</sub>Hs**

| Complex                                            | V1C7 <sub>G29R</sub> -RTA<br>(high PO <sub>4</sub> condition) | V1C7 <sub>G29R</sub> -RTA<br>(no PO <sub>4</sub> condition) |
|----------------------------------------------------|---------------------------------------------------------------|-------------------------------------------------------------|
| APS Beamline                                       | 24-ID-E                                                       | 24-ID-E                                                     |
| $d_{\min}$ (Å)                                     | 2.5                                                           | 2.5                                                         |
| wavelength (Å)                                     | 0.979                                                         | 0.979                                                       |
| No. of reflections                                 | 617554                                                        | 482323                                                      |
| Average redundancy <sup>a</sup>                    | 10.3(9.6)                                                     | 5.5(4.4)                                                    |
| $(I)/(\delta)$ <sup>a</sup>                        | 32.7(1.1)                                                     | 38.3(2.2)                                                   |
| Completeness <sup>a</sup> (%)                      | 100 (99.9)                                                    | 99.9(99.7)                                                  |
| $R_{\text{merge}}$ <sup>a,b</sup> (%)              | 11.0(279.3)                                                   | 8.0(73.9)                                                   |
| CC* <sup>c</sup>                                   | 0.88                                                          | 0.98                                                        |
| <b>Refinement</b>                                  |                                                               |                                                             |
| Bragg spacings (Å)                                 | 49.9-2.5                                                      | 49.8-2.5                                                    |
| Space group                                        | P3 <sub>2</sub> 21                                            | P3 <sub>2</sub> 21                                          |
| Cell parameters: $a, b, c$ (Å)                     | 64.9, 64.9, 215.9                                             | 64.9, 64.9, 215.4                                           |
| $R^d / R_{\text{free}}^e$ (%)                      | 20.2/25.7                                                     | 20.2/24.7                                                   |
| No. of reflections                                 | 19094                                                         | 18990                                                       |
| No. of waters                                      | 24                                                            | 47                                                          |
| Rmsd bond length (Å)                               | 0.006                                                         | 0.003                                                       |
| Rmsd bond angle (°)                                | 0.98                                                          | 0.75                                                        |
| B-factors (Å <sup>2</sup> ): main chain/side chain | 91.1 / 93.4                                                   | 74.3 / 77.5                                                 |
| Ramachandran favored / allowed <sup>f</sup> (%)    | 97.4 / 100.0                                                  | 98.4 / 100.0                                                |
| PDB code                                           | 5U4L                                                          | 5U4M                                                        |

## Figure Legends

**Figure S1. SPR analysis of V1C7 and V1C7<sub>G29R</sub>.** Sensorgrams from SPR analysis in which ricin-coated chips were probed with V1C7 or V1C7<sub>G29R</sub>. Relative resonance units (RU) are compared across the treatments.

**Figure S2. SPR analysis of V5C1 and V5C1<sub>R29G</sub>.** Sensorgrams from SPR analysis in which ricin-coated chips were probed with V5C1 or V5C1<sub>R29G</sub>. Relative resonance units (RU) are compared across the treatments.

**Figure S3. Homology models are similar to the initial V1C7–RTA template.** Superposition of 10 randomly chosen V5C1–RTA homology models (thin lines) on the initial V1C7–RTA template (thick line).

**Figure S4. Differential protection,  $\Delta(\text{HX})^-$ , as defined by equation 1, for RTA\* induced by V<sub>H</sub>H binding. (Panel A) V1C7, (Panel B) V1C7<sub>G29R</sub>, (Panel C) V5C1, (Panel D) V5C1<sub>R29G</sub>.** The horizontal dashed lines at  $-0.1$  denotes the threshold for strong protection. The dashed lines that follow the data denote the 99% confidence limit as described in the Materials and Methods. Gaps in the confidence limit indicate peptides with no available data. The horizontal axis is the ordinal number of each RTA\* peptide arranged in order from the N-terminus to the C-terminus. The location of each peptide is listed in **Supplemental Table S1**.

**Fig S5. Close-up of the interactions between V1C7<sub>G29R</sub> and RTA.** (A) High phosphate crystal form of RTA-V1C7<sub>G29R</sub>. RTA (slate), V1C7<sub>G29R</sub> (gray), and symmetry-related RTA (light blue) are drawn as ribbon diagrams. The bound phosphate molecule is drawn as sticks with oxygen atoms colored red and the phosphorous atom colored orange. (B) Interaction of symmetry-related RTA residues Arg 196 and Arg 235 (light blue) with RTA's Glu 67 (violet) from the high-phosphate crystal form. (C) Superposition of the no-phosphate crystal form of RTA-V1C7<sub>G29R</sub> (RTA colored magenta and V1C7<sub>G29R</sub> colored cyan) with the high-phosphate crystal form of RTA-V1C7<sub>G29R</sub> (RTA colored violet and V1C7<sub>G29R</sub> colored gray). (D) Interaction of symmetry-related RTA residues Arg 196 and Arg 235 (light blue) with RTA's Glu 67 (magenta) from the no-phosphate crystal form. All side chains are drawn as sticks and color coordinated to their respective main chain. Key distances between atoms are displayed as red dashes.

**Figure S6. Possible mechanism by which V5C1, as opposed to V1C7, achieves greater neutralization of ricin toxin.** (Panel A) In the V1C7–RTA crystal structure (PDB: 5J56), CDR3 residues Ser111<sub>V1C7</sub> and Gln113<sub>V1C7</sub> interact favorably with Gln160<sub>RTA</sub>, for a total interaction energy of  $-0.7$  REUs. This interaction may lock CDR3 away from RTA's epitope located between  $\alpha$ -helices D and E. (Panel B) In V5C1's representative model, Tyr111<sub>V5C1</sub> and Thr113<sub>V5C1</sub> have no interaction with Gln160<sub>RTA</sub> ( $0.0$  REU). This suggests that V5C1's CDR3 adopts an alternative conformation that contacts the epitope and leads to ricin neutralization, but this conformation departs too much from the V1C7 template to be sampled by our modeling.

# Figure S1.

## A. V1C7

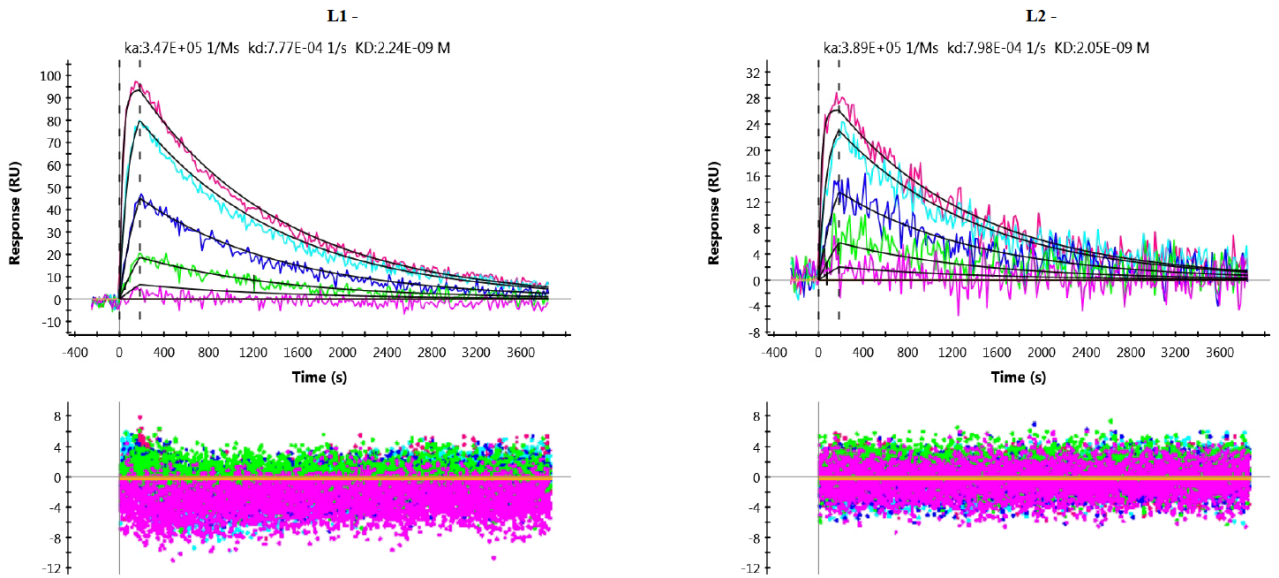

## B. V1C7 (G29R)

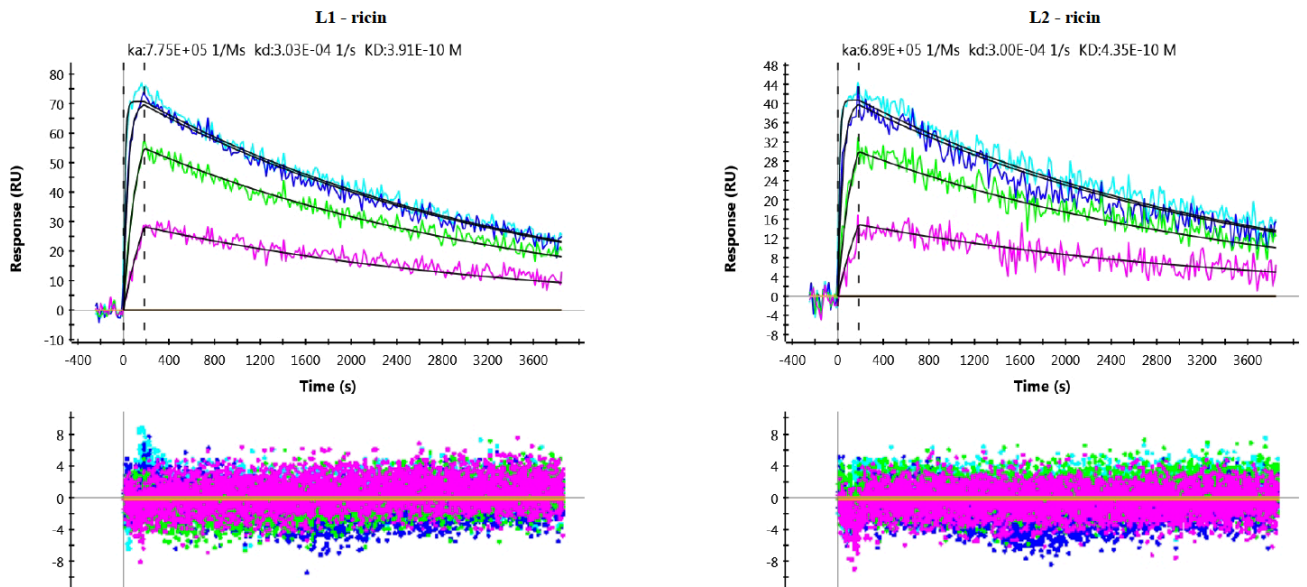

Figure S2.

### A. V5C1

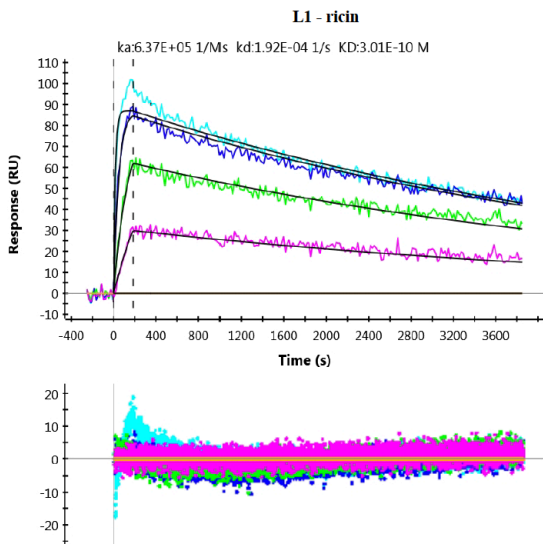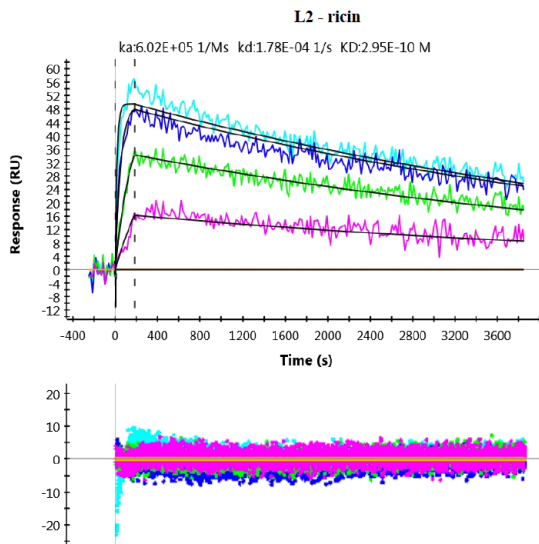

### B. V5C1 R29G

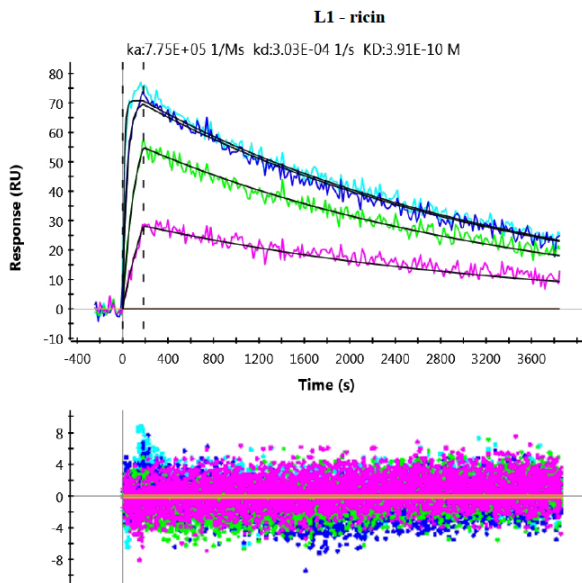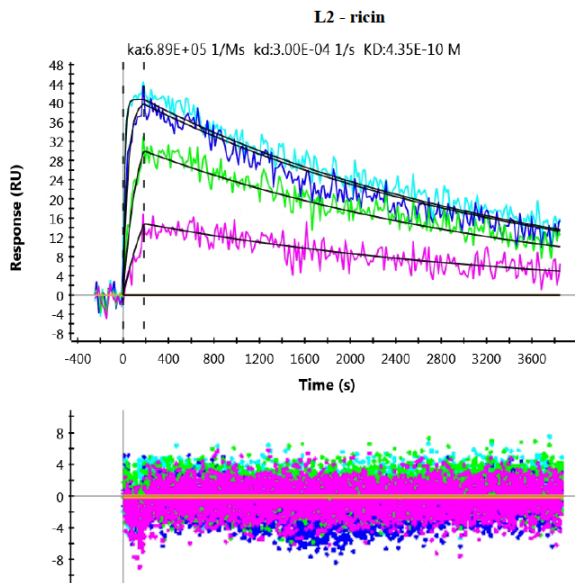

**Figure S3**

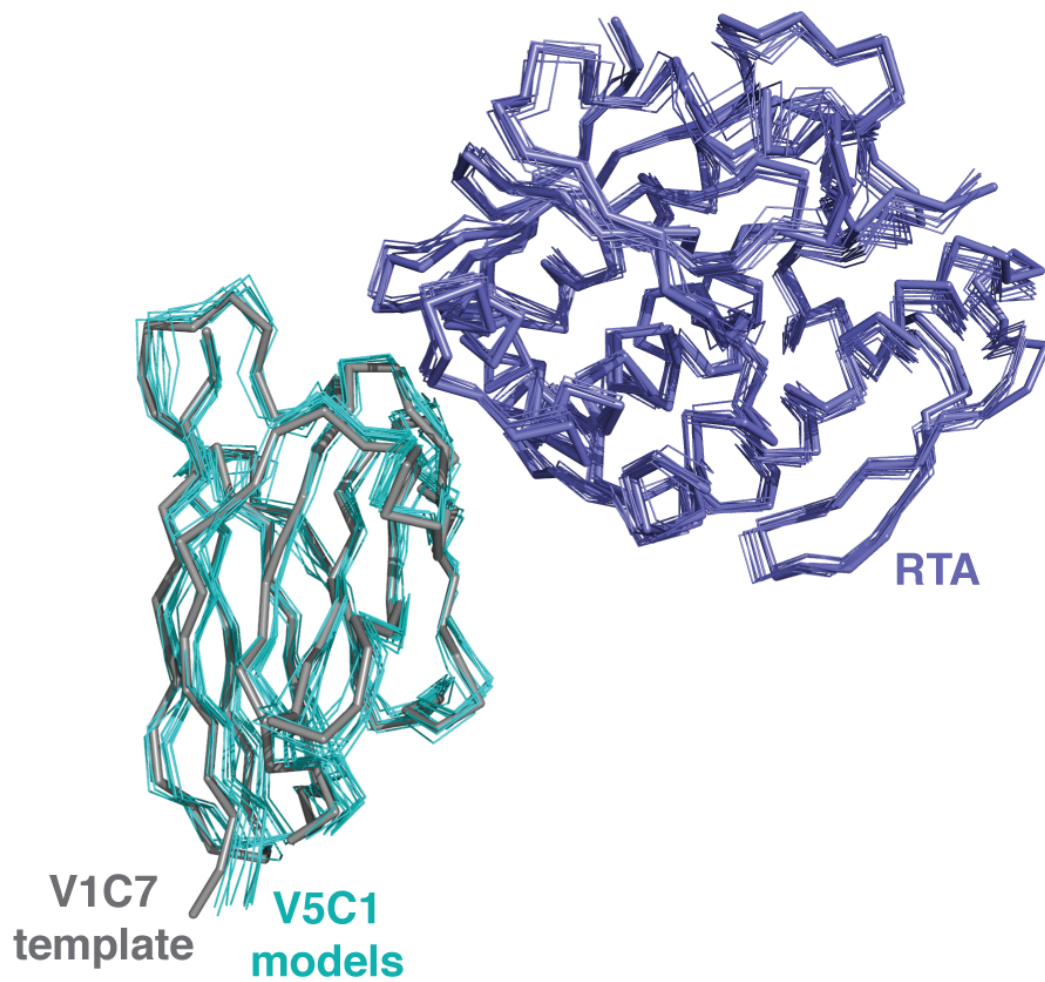

Figure S4

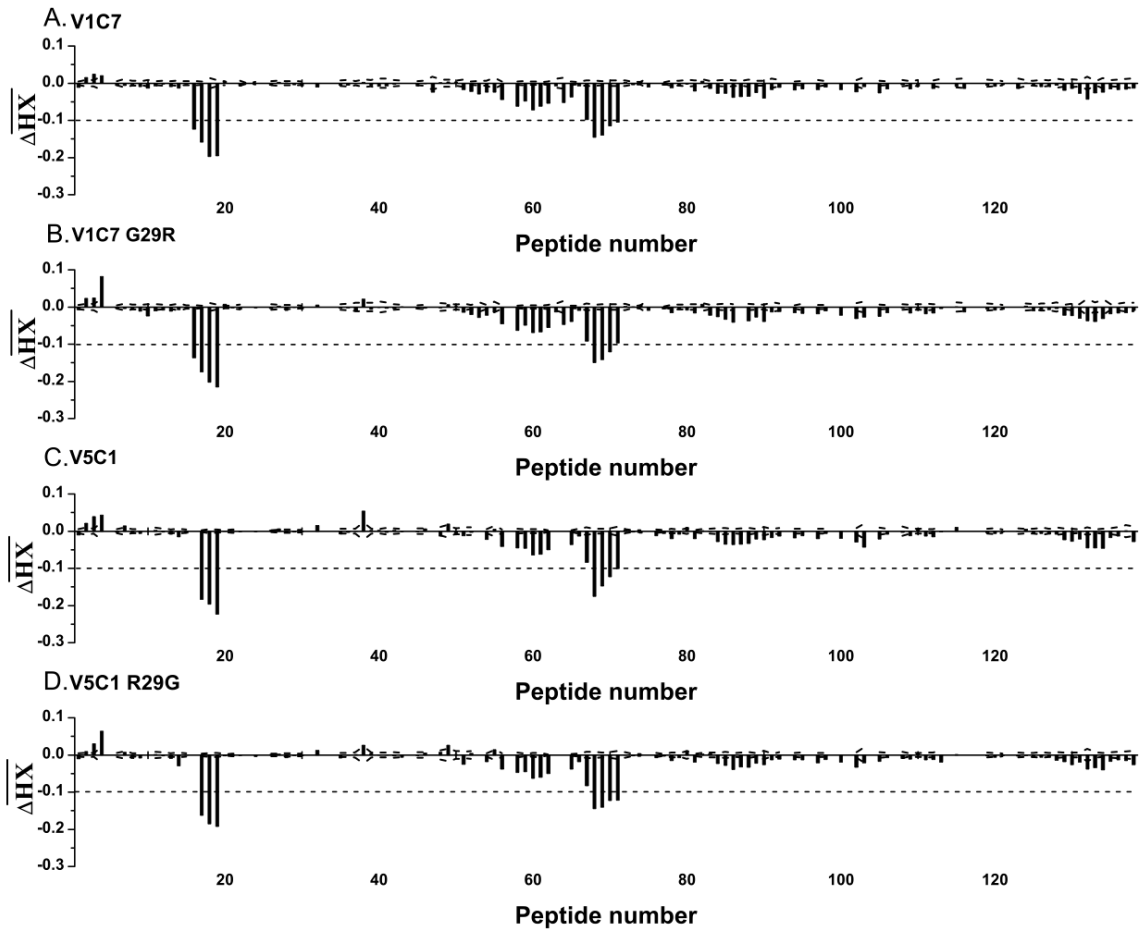

Figure S5.

A

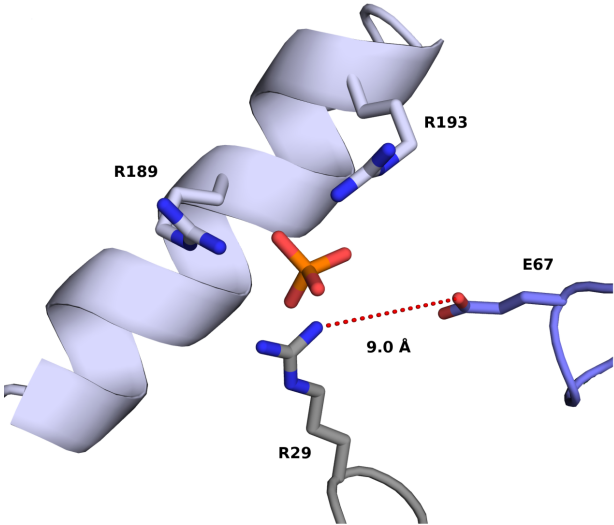

B

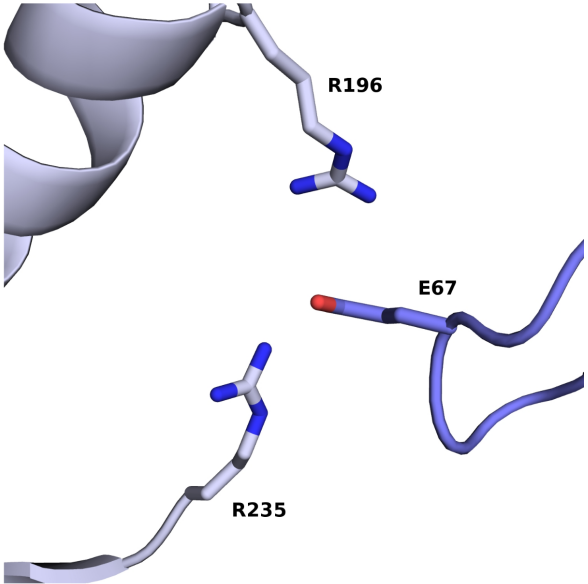

C

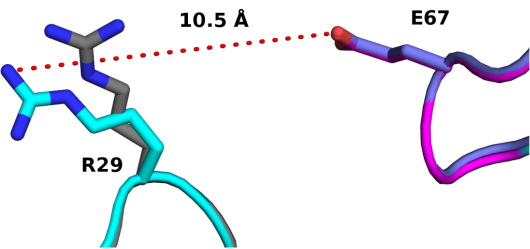

D

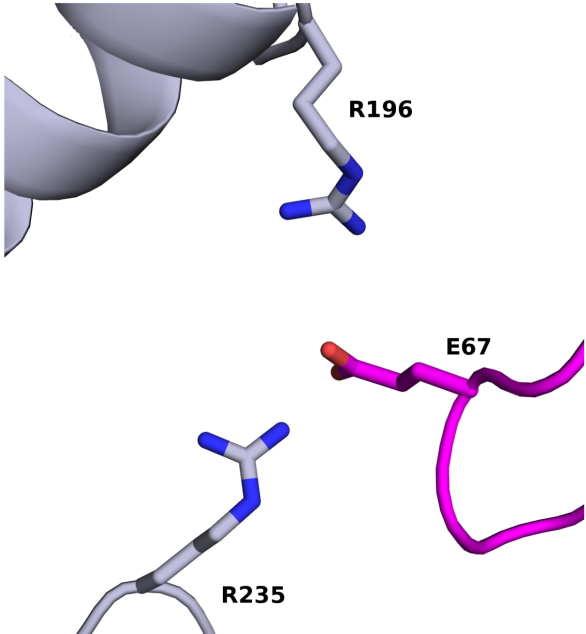



Figure S6.

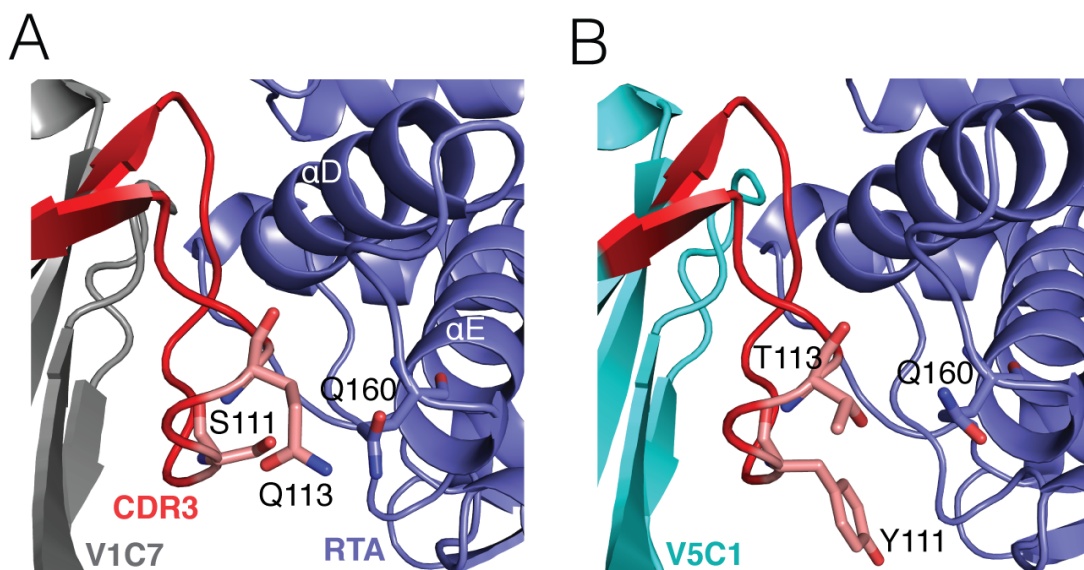

Supplement: NIHMS929890-supplement-Supp_info.pdf [file NIHMS929890-supplement-Supp_info.pdf]
